# Supplementary material for: Quantification of human mature frataxin protein expression in nonhuman primate hearts after gene therapy
Source: PubMed Central journal article supplement (PMC10611776; doi:10.1038/s42003-023-05472-z), 2023-10-27
Supplement: 42003_2023_5472_MOESM2_ESM.pdf [file 42003_2023_5472_MOESM2_ESM.pdf]

## **Description of Additional Supplementary Files**

**File name:** Supplementary Data 1

**Description:** Numerical source data for the graphs in Figures 2B and 2C.

**File name:** Supplementary Data 2

**Description:** Numerical source data for the graphs in Figure 5E.

**File name:** Supplementary Data 3

**Description:** Numerical source data for the graphs in Figure 7.

**File name:** Supplementary Data 4

**Description:** Numerical source data behind Table 2A.

**File name:** Supplementary Data 5

**Description:** Numerical source data behind Table 2B.
